# Supplementary material for: Scope, Breadth, and Differences in Online Physician Ratings Related to Geography, Specialty, and Year: Observational Retrospective Study
Source: PubMed Central journal article supplement (PMC5863010; doi:10.2196/jmir.7475), 2018-03-07
Supplement: jmir_v20i3e76_app1.pdf [file jmir_v20i3e76_app1.pdf]

|                       |       |       |       |        |
|-----------------------|-------|-------|-------|--------|
| Saskatchewan          | 0.474 | 0.467 | 0.480 | <0.001 |
| Ontario               | 0.469 | 0.467 | 0.471 | <0.001 |
| Alberta               | 0.465 | 0.461 | 0.469 | <0.001 |
| British Columbia      | 0.465 | 0.461 | 0.468 | <0.001 |
| Manitoba              | 0.456 | 0.450 | 0.462 | <0.001 |
|                       |       |       |       |        |
| <b>Year of rating</b> |       |       |       |        |
| 2005                  | 0.406 | 0.324 | 0.493 | 0.033  |
| 2006                  | 0.492 | 0.481 | 0.503 | 0.165  |
| 2007                  | 0.537 | 0.535 | 0.539 | <0.001 |
| 2008                  | 0.451 | 0.448 | 0.454 | <0.001 |
| 2009                  | 0.447 | 0.443 | 0.450 | <0.001 |
| 2010                  | 0.447 | 0.443 | 0.450 | <0.001 |
| 2011                  | 0.454 | 0.451 | 0.458 | <0.001 |
| 2012                  | 0.479 | 0.475 | 0.482 | <0.001 |
| 2013                  | 0.512 | 0.508 | 0.516 | <0.001 |
